# Supplementary material
Source: publisher figshare collection journal article supplement (https://frontiersin.figshare.com/ndownloader/files/26059601)
Supplement: Supplementary file [file 26059601]

**Supplementary Figure 1**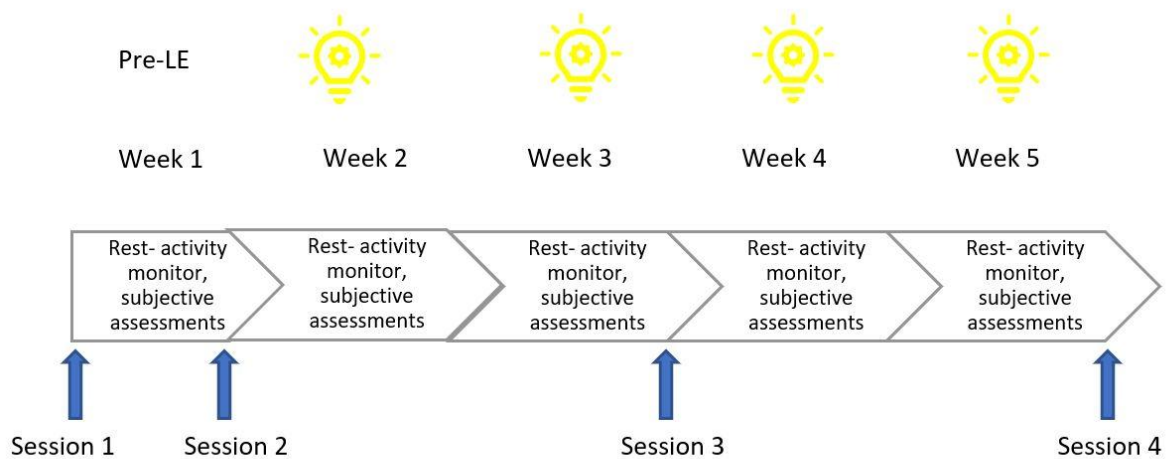

**Supplementary Figure 1:** Schematic study overview with the 4 sessions, where participants came to the laboratory. The pre-light exposure (LE) week and 4 LE weeks were spent at home, under normal daily routines while continuously recording rest-activity cycles and daily completion of self-assessments for sleep quality, mood, alertness, wellbeing and visual comfort. Pupillometry was performed during session 2 and 4. The yellow bulbs indicate the LE weeks with scheduled daily bright LE for 30 min.

## Supplementary Figure 2

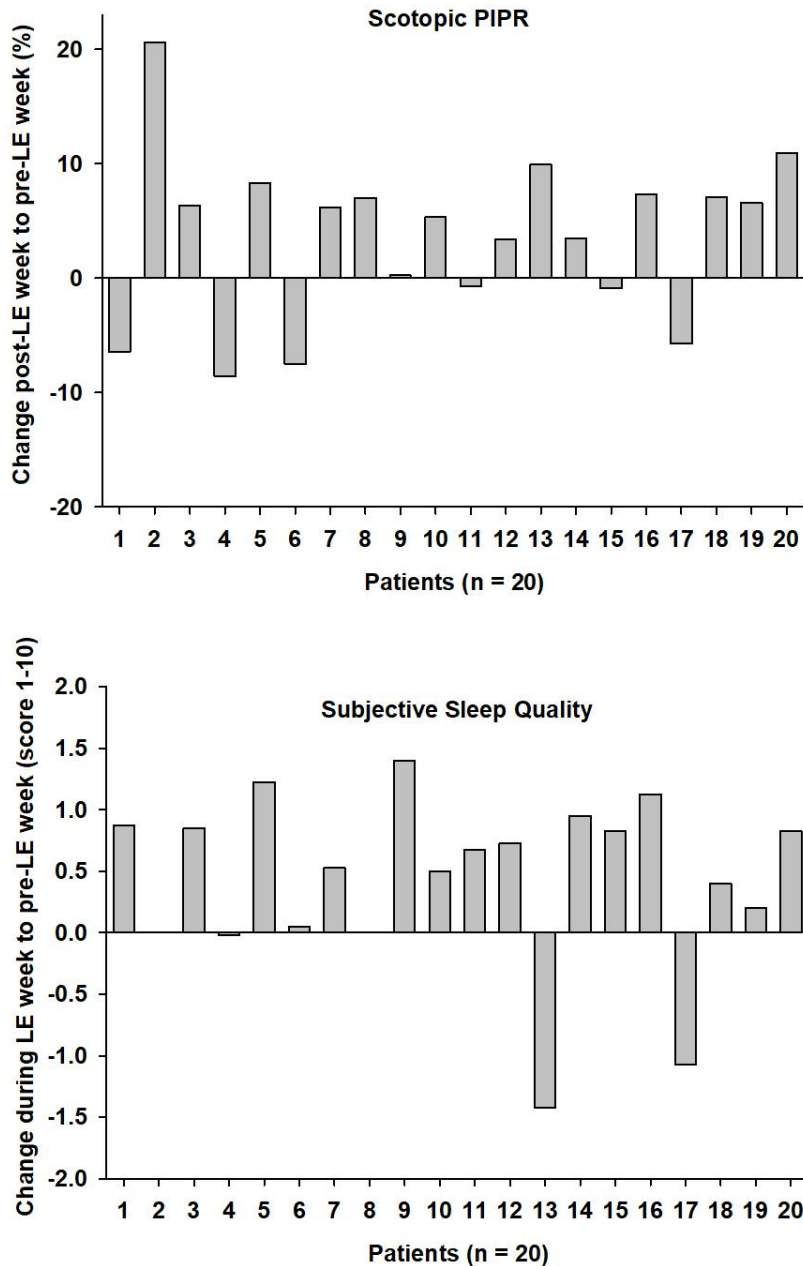

**Supplementary Figure 2:** The upper graph shows individual differences of the scotopic PIPR at higher luminance ( $170 \text{ cd/m}^2$ ; upper graph) between the pre-LE and post-LE (LE= light exposure). The lower graph shows individual differences in subjective sleep quality between the pre-LE (average of week 1) and LE weeks (average between weeks 2-5). The subjective sleep quality scores derived from the daily completed visual analogue scales for sleep quality ranging between 1 = very bad sleep and 10 = excellent sleep. The differences on both graphs are shown for each participant (1-20). Positive values indicate greater scotopic PIPR and greater subjective sleep quality (n = 20).

### Supplementary Figure 3

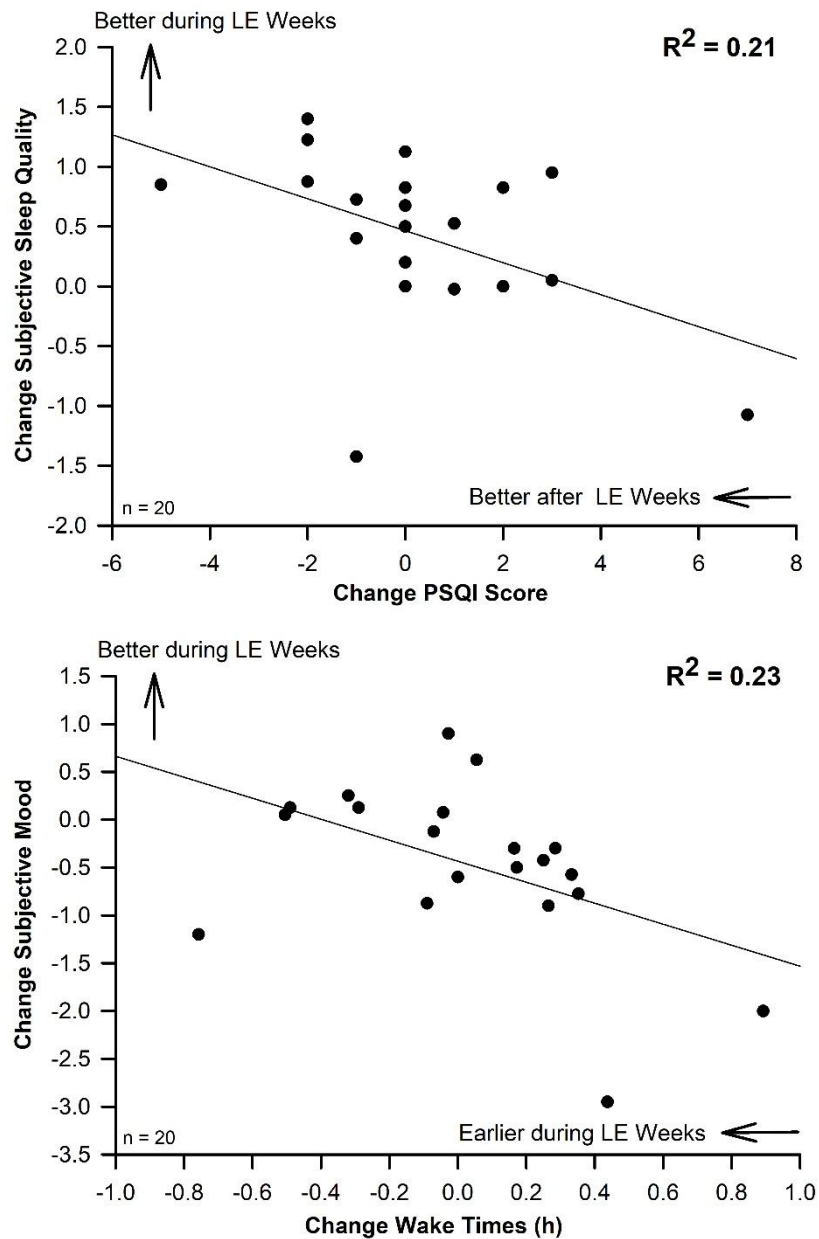

### Supplementary Figure 3

Upper graph: Scatterplots (and regression lines) with correlation analysis for changes of the PISQI and subjective sleep quality ( $p = 0.04$ ;  $R^2 = 0.21$ ) during LE weeks compared to pre-LE. Lower graph: correlation between changes of habitual wake time and subjective mood (from VAS) during LE weeks compared to pre-LE ( $p = 0.03$ ;  $R^2 = 0.23$ ; Pearson's correlation;  $n = 20$ ). The direction of effects is indicated with arrows in the respective corner of the upper and lower graph;  $n = 20$ .

**Supplementary Table 1**

|                             | <b>Mean (SD)</b> |
|-----------------------------|------------------|
| Age (years)                 | 67.55 (7.45)     |
| Sex (Female/Male)           | 9/11             |
| VA RE                       | 0.80 (0.19)      |
| VA LE                       | 0.89 (0.22)      |
| Mean VA (both eyes)         | 0.85 (0.17)      |
| Octopus MD RE (dB)          | 5.58 (4.77)      |
| Octopus MD LE (dB)          | 5.24 (3.85)      |
| Mean Octopus MD (both eyes) | 5.41 (3.17)      |
| OCT RNFL RE (A; B; N)       | 17A; 2B #        |
| OCT RNLF LE (A; B; N)       | 18A; 1N #        |

Demographics and eye examination results, shown as mean values  $\pm$  Standard Derivations (SD; in brackets; n = 20). RE = right eye; LE = left eye; VA = visual acuity; MD = mean deviation; OCT = optical coherence tomography; RNFL = thickness of retinal nerve fiber layer; A = OCT RNFL abnormal; B = OCT RNFL borderline; N = OCT RNFL normal; #: n=19 (one patient's data missing).

**Supplementary Table 2**

|                      | <b>Mean (SD; range)</b>               |
|----------------------|---------------------------------------|
| MCTQ (MSF-Sc)        | 3.0 (1.1; 1.25 - 5.29)                |
| ESS                  | 5.8 (4.4; 0 - 19)                     |
| HO                   | 64.0 (9.0; 45 - 82)                   |
| SPAQ                 | 5.2 (5.5; 0 - 16)                     |
| BDI                  | 3.1 (3.0; 0 - 10)                     |
| PSQI <sup>a, b</sup> | 5.5 (3.4; 1 - 12) / 5.7 (4.1; 1 - 14) |

Results from screening questionnaires are shown as mean ( $\pm$  SD; range, in brackets) values for: the Munich Chronotype Questionnaire (MCTQ; MSF-Sc = midsleep on free days, sleep duration corrected); Epworth sleepiness scale (ESS); Horne Ostberg (HO); Seasonal Pattern Assessment Questionnaire SPAQ); Becks Depression Inventory (BDI); Pittsburgh Sleep Quality Index (PSQI); <sup>a</sup> = mean PSQI post-light light exposure; <sup>b</sup> = not significant ( $p > 0.67$ );  $n = 20$ .

**Supplementary Table 3**

|                               |                 |                                                |
|-------------------------------|-----------------|------------------------------------------------|
| irradiance, mW/m <sup>2</sup> | illuminance, lx | log photon irradiance, log10/s/cm <sup>2</sup> |
| 10357.53                      | 3547.97         | 15.462                                         |

|                                                               | S-cone-opic | M-cone-opic | L-cone-opic | Rhodopic | Melanopic |
|---------------------------------------------------------------|-------------|-------------|-------------|----------|-----------|
| α-opic irradiance, mW/m <sup>2</sup>                          | 1943.86     | 4591.69     | 5673.87     | 3410.49  | 2709.43   |
| α-opic equivalent daylight (D65) illuminance (α-opic EDI), lx | 2378.42     | 3154.01     | 3483.24     | 2352.54  | 2042.98   |
| α-opic log photon irradiance, log/s/cm <sup>2</sup>           | 14.641      | 15.097      | 15.209      | 14.938   | 14.824    |

Measurements of the light source (EnergyUp I/ HF3419™ Philips, The Netherlands) taken in 50 cm distance at the vertical eye level of a user with a spectroradiometer (Specbos 1201, Jeti, Jena, Germany). The alpha-opic (α-opic) units are based on the standard of the Commission International de l'Éclairage (CIE S 026) and calculated by using the Toolbox beta version E1.051 – 20190319.

Supplementary Table 4

| Baseline<br>Pupil Sizes | Pre-LE      |             | Post-LE                    |                           |
|-------------------------|-------------|-------------|----------------------------|---------------------------|
|                         | Right Eyes  | Left Eyes   | Right Eyes                 | Left Eyes                 |
| Photopic (low)          | 3.50 (0.73) | 3.47 (0.66) | 3.59 (0.71)                | 3.49 (0.66)               |
| Photopic (high)         | 3.41 (0.73) | 3.52 (0.61) | 3.51 (0.72)                | 3.58 (0.63)               |
| Scotopic (low)          | 5.07 (0.76) | 4.97 (0.82) | <b>5.14*</b> <b>(0.77)</b> | <b>4.86</b> <b>(0.86)</b> |
| Scotopic (high)         | 4.61 (0.73) | 4.48 (0.64) | <b>4.64*</b> <b>(0.64)</b> | <b>4.39</b> <b>(0.72)</b> |

Baseline (BL) pupil sizes [mm; mean (SD, in brackets)] obtained before photopic and scotopic light pupil test stimuli at two different luminance levels: 56 cd/m<sup>2</sup> (indicated as low) and 170 cd/m<sup>2</sup> (indicated as high), for pre-LE week (LE = light exposure; i.e. before the 4 weeks with daily scheduled bright light exposure) and post-LE (i.e. after 4 weeks of daily scheduled bright light exposure). \* =  $p < 0.05$ ; with smaller baseline pupil sizes for left than right eyes (significant results are shown in bold); n = 20.

**Supplementary Table 5**

|                             | <b>PRE-LE week</b> | <b>LE week 5</b> |
|-----------------------------|--------------------|------------------|
| <b>Bedtime</b>              | 23.59 (1.19)       | 23.61 (1.30)     |
| <b>Sleep Onset</b>          | 23.79 (0.26)       | 23.88 (0.29)     |
| <b>Wake Time</b>            | 7.24 (0.22)        | 7.28 (0.25)      |
| <b>Get up Time</b>          | 7.33 (0.99)        | 7.35 (1.14)      |
| <b>Time in Bed</b>          | 7.72 (0.74)        | 7.73 (0.94)      |
| <b>Sleep Duration</b>       | 7.44 (0.73)        | 7.38 (0.91)      |
| <b>Wake Duration</b>        | 0.68 (0.39)        | 0.72 (0.32)      |
| <b>Sleep Efficiency (%)</b> | 87.43 (6.42)       | 86.13 (6.09)     |
| <b>Sleep Latency</b>        | 0.21 (0.16)        | 0.27 (0.23)      |

Sleep variables derived from rest-activity recordings (same variables as Table 3 of the main text); all times are indicated in decimal clock time or hours; LE = light exposure; all values are indicated as means and SD (in brackets) and shown for the PRE-LE week and LE week 5 (i.e. the last week of daily scheduled bright light exposure),  $n = 20$  (there were no statistically significant differences between both weeks;  $p > 0.36$ ).
